# Supplementary material
Source: publisher figshare collection journal article supplement (https://acs.figshare.com/ndownloader/files/5458715)
Supplement: Supplementary file 1 [file 5458715]

## Supporting information

### The Effect of Pore Size Distribution of Carbon Matrix On The Performance of Phosphorus@Carbon Material As Anode For Lithium Ion Batteries

Jiaoyang Li <sup>a</sup>, Li Wang<sup>a,b\*</sup>, Xiangming He <sup>a\*</sup>, Jianlong Wang <sup>a</sup>

a Institute of Nuclear & New Energy Technology, Tsinghua University, Beijing,  
100084

b State Key Laboratory of New Ceramics and Fine Processing, Beijing, 100084

\*Corresponding author: [hexm@tsinghua.edu.cn](mailto:hexm@tsinghua.edu.cn); [wang-l@tsinghua.edu.cn](mailto:wang-l@tsinghua.edu.cn)

Table. S1 The average particle size of active carbon

| Samples                                 | YH-11 | Cb    | B1-01 | YP-50F |
|-----------------------------------------|-------|-------|-------|--------|
| Average particle size ( $\mu\text{m}$ ) | 91.16 | 79.05 | 36.32 | 34.41  |

Table. S2 The pore volume of pores smaller than 1 nm

| Samples                                     | YH-11 | Cb   | B1-01 | YP-50F |
|---------------------------------------------|-------|------|-------|--------|
| Pore volume ( $\text{cm}^3 \text{g}^{-1}$ ) | 0.38  | 0.41 | 0.50  | 0.55   |

Table. S3 The weight analysis of the samples

| Carbon | C ( $\text{g}^{-1}$ ) | P-C ( $\text{g}^{-1}$ ) | P Content (wt%) |
|--------|-----------------------|-------------------------|-----------------|
| Cb     | 2.0007                | 3.7764                  | 47.021          |
| YH-11  | 2.0013                | 3.7773                  | 47.018          |
| B1-01  | 2.0008                | 3.7765                  | 47.020          |
| YP-50F | 2.0011                | 3.7772                  | 47.022          |

Table S4 Electrochemical performance of phosphorus@carbon composites in lithium battery.

| Sample                                         | Initial discharge/charge capacity (mAh g <sup>-1</sup> ) | Cyclic performance                                                                | Reference |
|------------------------------------------------|----------------------------------------------------------|-----------------------------------------------------------------------------------|-----------|
| Amorphous phosphorus-carbon composite          | 2651/2355 <sup>b</sup>                                   | Minor decline 90% of capacity is reported to remain after 100 cycles              | 1         |
| Activated phosphorus-carbon composite          | 3289/1385 <sup>b</sup>                                   | Declining 900 mAh g <sup>-1</sup> capacity after 20 cycles                        | 2         |
| Nanostructured red phosphorus-carbon composite | 1200/840 <sup>a</sup>                                    | Relatively stable capacity. Minor decline 745 mAh g <sup>-1</sup> after 50 cycles | 3         |
| Nanoconfined phosphorus in mesoporous carbon   | 1281/no reported <sup>a</sup>                            | Remain 850 mAh g <sup>-1</sup> after 20 cycles                                    | 4         |
| Phosphorus @YP-50F                             | 2790/2217 <sup>a</sup>                                   | Remain 1370 mAh g <sup>-1</sup> after 100 cycles                                  | This work |

<sup>a</sup> Capacity is calculated per total weight of the phosphorus@carbon composite.

<sup>b</sup> All capacity is assigned to the phosphorus component, the capacity of carbon components is neglected as minor contribution.

(1) Qian, J.; Qiao, D.; Ai, X.; Cao, Y.; Yang, H., Reversible 3-Li storage reactions of amorphous phosphorus as high capacity and cycling-stable anodes for Li-ion batteries. *Chem. Commun.* **2012**, *48*, 8931-8933.

(2) Marino, C.; Debenedetti, A.; Fraisse, B.; Favier, F.; Monconduit, L., Activated-phosphorus as new electrode material for Li-ion batteries. *Electrochem. Commun.* **2011**, *13*, 346-349.

(3) Wang, L.; He, X.; Li, J.; Sun, W.; Gao, J.; Guo, J.; Jiang, C., Nano-Structured Phosphorus Composite as High-Capacity Anode Materials for Lithium Batteries. *Angew. Chem. Int. Ed.* **2012**, *51*, 9034-9037.

(4) Marino, C.; Boulet, L.; Gaveau, P.; Fraisse, B.; Monconduit, L., Nanoconfined phosphorus in mesoporous carbon as an electrode for Li-ion batteries: performance and mechanism. *J. Mater. Chem.* **2012**, *22*, 22713-22720.

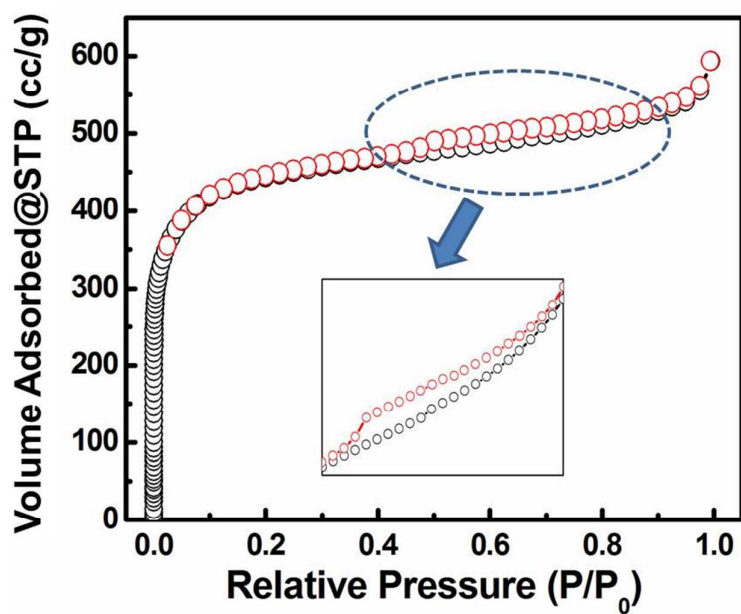

Fig. S1 Nitrogen adsorption and desorption isotherms of active carbon (The four carbons have the similar curve, therefore we only use a sketch to express them).

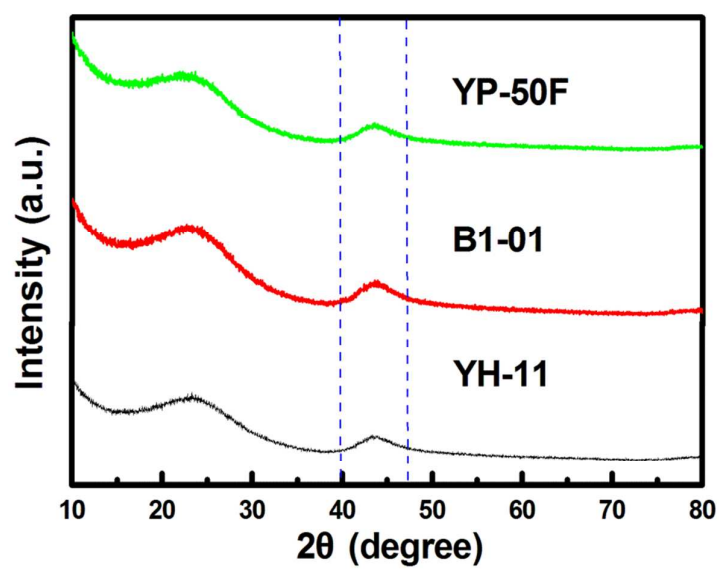

Fig. S2 The XRD patterns of active carbon.

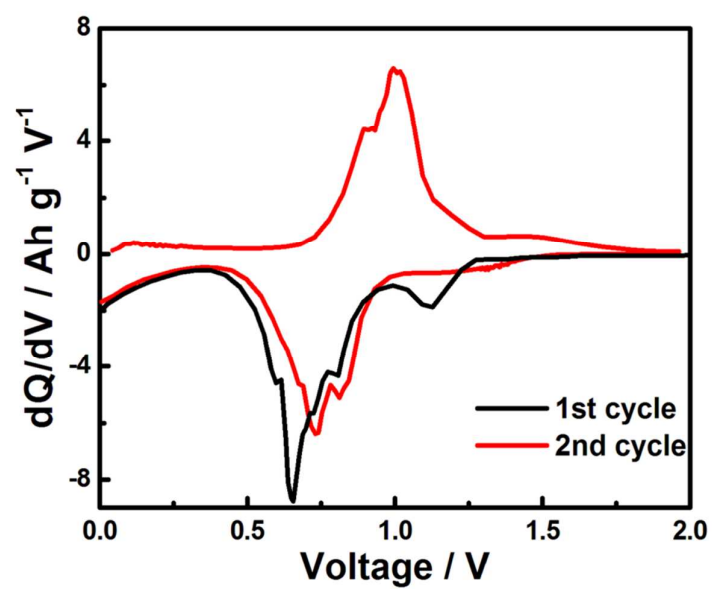

Fig. S3 The differential capacity plots (DCPs) of the phosphorus@YP-50F.
